# Supplementary material for: Quality assurance of medicines supplied to low-income and middle-income countries: poor products in shiny boxes?
Source: PubMed Central journal article supplement — BMJ Glob Health. 2017 Mar 29;2(2):e000172. doi: 10.1136/bmjgh-2016-000172 (PMC5435257; doi:10.1136/bmjgh-2016-000172), 2017-03-29
Supplement: bmjgh-2016-000172supp_annex3.pdf [file bmjgh-2016-000172supp_annex3.pdf]

## QUESTIONS ABOUT MQAS AUDITS RESULTS

- **Good Distribution Practices**

QUAMED's audit results show that most European procurement agencies performs better in warehouse management and good distribution practices than in control of products at reception.

*Does this correspond to your experience as well?*

- **General requirements**

QUAMED's audit results show that most of European procurement agencies easily fulfil with the MQAS general requirements. By contrast, most of sub-Saharan Africa doesn't.

*In your opinion, which are the main reasons that explain this difference between the two continents?*

- **Quality control**

QUAMED's audit results show your commitment with the quality control. Nevertheless, this is not true for all European procurement agencies and quality control is a neglected aspect by almost all sub-Saharan Africa procurement agencies.

*In your opinion, which are the main challenges faced by procurement when implementing this elements of the MQAS?*

- **Pre qualification**

QUAMED's audit results show that most of procurement agencies in both continents have difficulties in implementing proper product's prequalification processes (manufacturing site assessment is the most difficult to implement while procedure for qualification decision are well implemented,

*In your opinion, which are the main challenges when implementing product prequalification? Any planned strategy in the future?*

*(\*) How the European legislative framework influences?*

- **Reassessment**

Finally, this element is also considered important among MQAS criteria. Unfortunately, according to audit's results, it is almost neglected in most organizations. You are an exception.

*Which are the main challenges you have faced in the past in terms of monitoring? Which are the recommendations you would give to those organisations who should already improve this criteria?*

## GENERAL QUESTIONS

- In your opinion, which are/is the most difficult MQAS's criteria to achieve? Why?
- African: Do you consider yourself responsible for all MQAS's criteria?
- European: Do you feel comfortable with all MQAS's elements you are supposed to do?

- What was your turnover last year? (an estimation)
- How many employees do you have? How many pharmacists?
- Is your organisation legally and financially independent? Depending on the case, how this influences your performance for the establishment of MQAS?
- How was your organisation put in place?
- Do you have a monopoly in the public sector (Do the public health structures have to buy to you)? Do you have direct competitors (wholesalers who also sell to the public sector for example)?
- Do you work with vertical programs (eg the Global Fund)? If so, do you provide them or only do you do the storage?
- Who are your key customers as% of turnover (public, private, NGOs)? (an estimation)
- What is your relationship with the National Authority for Regulating Drugs?
- How the international legislation influences to the product qualification?
