# Supplementary material for: Quality assurance of medicines supplied to low-income and middle-income countries: poor products in shiny boxes?
Source: PubMed Central journal article supplement — BMJ Glob Health. 2017 Mar 29;2(2):e000172. doi: 10.1136/bmjgh-2016-000172 (PMC5435257; doi:10.1136/bmjgh-2016-000172), 2017-03-29
Supplement: bmjgh-2016-000172supp_annex4.pdf [file bmjgh-2016-000172supp_annex4.pdf]

MASTER OF PUBLIC HEALTH  
INSTITUTE OF TROPICAL MEDICINE D'ANVERS

**Knowledge and perceptions towards the implementation of the WHO-MQAS  
good practices**

INFORMATION SHEET

Dear Ijland,

I am Ariadna Nebot Giralt and I am doing a Master in Public Health of the Institute of Tropical Medicine (Belgium). My master thesis is carried out in collaboration with QUAMED, and it consists of an assessment of the quality assurance systems of pharmaceutical procurement agencies, both in sub-Saharan Africa and in Europe.

The methodology of this work primarily consists in extracting from the audit reports issued by QUAMED since 2011 the information concerning procurement agencies' implementation of the WHO-MQAS good practices, and analysing it. In order to carry out a more comprehensive analysis of the procurement agencies' achievements and shortcomings, and of their underlying causes, we would like to integrate the data extracted from the audits' reports with qualitative data. These qualitative data will be obtained by interviewing a few key-actors from concerned procurement agencies.

I would like to request you, as representative of *IDA Foundation*, to participate in this assessment. This would consist in an interview, either by phone or Skype that will approximately take 40' to 1 hour.

In order to ensure the best accuracy, the interview will be registered and its contents will be transcribed. The transcriptions will be used to develop my Master in Public Health's thesis, and if possible also a publication in a peer-reviewed medical journal.

To ensure full confidentiality, the transcriptions will only be available to me, to my coach and to the QUAMED researchers collaborating at this work. The audiotapes will be destroyed or erased at the completion of the assessment, while the transcriptions will be fully anonymized. Your name and affiliation will not appear either in the thesis or in the publication, unless in case of different requirement from you.

### CONSENT FORM

- You may consent to participate by confirming by email that you are available for the interview.
- If you wish that your contribution is acknowledged either in the thesis, or in the publication or both, please let me know (with the same email, or at a later stage by email).
- If you wish to receive a copy of the thesis and/or publication, please let me know (with the same email, or at a later stage by email).
